# Supplementary material
Source: publisher figshare collection journal article supplement (https://adisjournals.figshare.com/articles/dataset/_/23599077)
Supplement: Supplementary file 1 [file 2]

Plain language summary for Original Article:

Despite improvements in the management of psoriasis, there is room for the standard of care for patients to be improved further. The aim of the ‘Epicensus’ programme is to help realise improvements by bringing together three important stakeholder groups involved in the care of patients with psoriasis: dermatologists, payors and patient representatives. First, unmet needs were explored with these stakeholders and eight themes for change were identified: 1) improve healthcare systems to better support multidisciplinary team working and digital services; 2) optimise real-world data generation and use; 3) improve patient access; 4) elevate quality-of-life measures as the most important outcomes; 5) involve patients in people-centred and personalised approaches to care; 6) improve the relevance and reach of guidelines; 7) education; 8) multistakeholder engagement. Next, a panel of experts representing the three stakeholder groups took part in a consensus process (Delphi) to reach agreement on statements relating to each of the eight themes. The statements describe current problems and what needs to be changed to raise the standard of care for patients with psoriasis. Some of the problems identified are similar to those that existed a decade ago, showing that simply recognising what needs to change is not enough to bring about improvements:action must be taken. Therefore, the Epicensus participants met to produce specific ‘Calls to Action’ – practical steps described in this publication that, if put into practice, should contribute to an improvement in the standard of care for patients with psoriasis.
